# Supplementary material
Source: ML conference proceedings conference paper supplement (https://www.ecva.net/papers/eccv_2020/papers_ECCV/html/123520052_ECCV_2020_paper.php)
Supplement: Supplementary file 1 [file 123520052-supp.zip]

# Across Scales & Across Dimensions: Temporal Super-Resolution using Deep Internal Learning

Supplementary Material

Paper ID 132

**PLEASE VIEW THE ATTACHED VIDEO**

## 1 TSR Benchmark

We curated a challenging dataset of 25 LTR (low temporal resolution) videos of very complex fast dynamic scenes, as if recorded by a ‘slow’ video camera (30 fps with full inter-frame exposure time). These videos contain complex scene dynamics, highly non-rigid motions, severe motion-blurs and/or severe motion-aliasing. Fig. 1 (in this document) shows a sample frame from each video, and Table 1 (in this document) summarises the lengths and frame sizes of the HTR (high temporal resolution) ground-truth videos.

The dataset was generated from 25 very different real videos recorded with high speed (mostly 240 fps) consumer cameras. Some of these videos were downloaded from the web, and some taken from the Need-for-Speed [4] benchmark. The LTR videos were generated from these HTR videos by *blurring and sub-sampling them in time* by a factor of 8 (by averaging every 8 frames). This is equivalent to a ‘slower’ video camera recording the same dynamic scene, with full inter-frame exposure-time, at 1/8 framerate (30 fps). These LTR videos were fed as inputs to the different algorithms.

We further split our dataset into two groups: (i) 13 extremely challenging videos, not only with severe motion blur, but also with severe motion aliasing and/or complex highly non-rigid motions (e.g., splashing water, flickering fire, etc.); (ii) 12 less challenging videos, still with severe motion blur, but mostly rigid motions. This was done in order to highlight the type of videos that benefit the most from Internal-Learning.

Table 2 (in this document) lists the average per-frame PSNR, structural similarity (SSIM), and a perceptual measure (LPIPS [5]), computed for each method on each video. To avoid boundary effects we did not include the first and last 30 frames of each sequence. We also disregarded a 20-pixel boundary around each frame when computing per-frame PSNR. This wide masking of the boundaries was done to accommodate large margin that some of the other algorithms require.

The results in Table 2 (of this document) indicate that sophisticated frame-interpolation methods (DAIN [1], NVIDIA SloMo [2]) are not adequate for the task of Temporal Super Resolution (TSR), and are significantly inferior (-1 dB) on LTR videos compared to dedicated TSR methods (Ours and Flawless [3]). Flawless and Ours provide comparable quantitative results on the dataset, even though Flawless is a pre-trained supervised

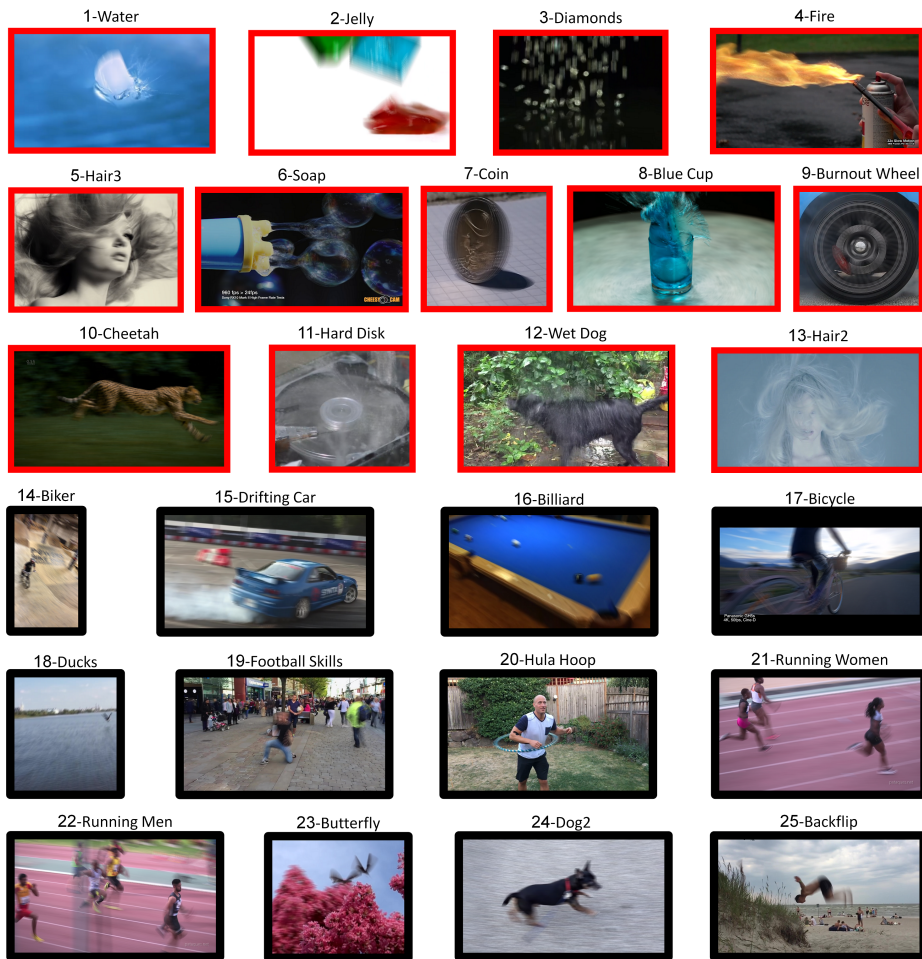

**Fig. 1: Representative frames of the TSR benchmark:** One frame from each LTR video in the benchmark. The video numbering is consistent with that used in all the tables of this document. Red frames mark the subset of more challenging videos.

| #  | Video Name    | # Frames | Resolution | #  | Video Name      | # Frames | Resolution |
|----|---------------|----------|------------|----|-----------------|----------|------------|
| 1  | Water         | 280      | 640 x 360  | 14 | Biker           | 720      | 1280 x 720 |
| 2  | Jelly         | 480      | 640 x 360  | 15 | Drifting Car    | 400      | 1280 x 720 |
| 3  | Diamonds      | 360      | 448 x 360  | 16 | Billiard        | 480      | 1280 x 720 |
| 4  | Fire          | 440      | 1280 x 720 | 17 | Bicycle         | 240      | 1280 x 720 |
| 5  | Hair3         | 360      | 704 x 512  | 18 | Ducks           | 840      | 512 x 568  |
| 6  | Soap          | 480      | 1280 x 720 | 19 | Football Skills | 440      | 1280 x 720 |
| 7  | Coin          | 200      | 512 x 432  | 20 | Hula Hoop       | 320      | 1280 x 720 |
| 8  | Blue Cup      | 240      | 960 x 536  | 21 | Running Women   | 440      | 1280 x 720 |
| 9  | Burnout Wheel | 440      | 544x560    | 22 | Running Men     | 440      | 1280 x 720 |
| 10 | Cheetah       | 240      | 1280 x 704 | 23 | Butterfly       | 440      | 560 x 480  |
| 11 | Hard Disk     | 360      | 704 x 720  | 24 | Dog2            | 400      | 1280 x 720 |
| 12 | Wet Dog       | 400      | 1280 x 720 | 25 | Backflip        | 400      | 1280 x 720 |
| 13 | Hair2         | 400      | 1280 x 720 |    |                 |          |            |

Table 1: **Details of the TSR Benchmark:** Lengths and frame sizes of the HTR videos.

method, whereas Ours is unsupervised and requires no prior training examples. Moreover, on the subset of extremely challenging videos (with highly complex non-rigid motions), our Zero-Shot TSR outperforms the state-of-the-art externally trained Flawless [3]. Since rigid motions are easier to model and capture in an external training set, Flawless provided high-quality results (better than ours) on the videos which are dominated by rigid motions. However, even in those videos, when focusing on the areas with non-rigid motions, our method visually outperforms the externally trained Flawless. While these non-rigid areas are smaller in those videos (hence have negligible effect on PSNR), they often tend to be the salient and more interesting regions in the frame. Such examples can be found in the Supplementary-Video (e.g., the billiard-ball in Video-16, the hula-hoop in Video-20, the person performing a back-flip in Video-25, etc.), as well as in *Fig.1 of the paper*.

## 2 Ablation Study

Table 3 (in this document) details the ablation study designed to examine the power of cross-dimension augmentations for all videos in the dataset. It compares the performance of our network when: (i) Training only on examples from *same-dimension* ('Within'); (ii) Training only on examples *across-dimensions* ('Across'); (iii) Training each video on its best configuration – 'within', 'across', or on both.

Since our atomic TSRx2 network is trained only on a coarse spatial scale of the video, we performed the ablation study at that scale (hence the differences between the numeric values in Tables 2 and 3). Table 2 indicates that, on the average, the cross-dimension augmentations are more informative than the within (same-dimension) augmentations. However, since different videos have different preferences, training each video with its best within and/or across configuration provides a small additional overall improvement. For more details see paper.

| #  |                  | Ours      |       |       | Flawless  |       |       | DAIN      |       |       | Nvidia SloMo |       |       | Linear Interp. |       |       |
|----|------------------|-----------|-------|-------|-----------|-------|-------|-----------|-------|-------|--------------|-------|-------|----------------|-------|-------|
|    |                  | PSNR [dB] | SSIM  | LPIPS | PSNR [dB] | SSIM  | LPIPS | PSNR [dB] | SSIM  | LPIPS | PSNR [dB]    | SSIM  | LPIPS | PSNR [dB]      | SSIM  | LPIPS |
| 1  | Water            | 31.31     | 0.965 | 0.098 | 30.90     | 0.962 | 0.093 | 30.45     | 0.959 | 0.118 | 30.46        | 0.958 | 0.117 | 29.92          | 0.950 | 0.132 |
| 2  | Jelly            | 26.94     | 0.937 | 0.083 | 25.87     | 0.925 | 0.082 | 24.81     | 0.917 | 0.107 | 24.66        | 0.913 | 0.108 | 24.50          | 0.910 | 0.116 |
| 3  | Diamonds         | 22.70     | 0.819 | 0.262 | 22.42     | 0.819 | 0.218 | 20.59     | 0.755 | 0.349 | 20.87        | 0.764 | 0.321 | 20.82          | 0.749 | 0.348 |
| 4  | Fire             | 29.41     | 0.974 | 0.092 | 28.53     | 0.971 | 0.105 | 28.66     | 0.972 | 0.090 | 28.52        | 0.970 | 0.093 | 28.54          | 0.973 | 0.094 |
| 5  | Hair3            | 24.59     | 0.877 | 0.235 | 24.00     | 0.871 | 0.252 | 23.77     | 0.863 | 0.280 | 23.50        | 0.853 | 0.266 | 23.53          | 0.861 | 0.276 |
| 6  | Soap             | 27.20     | 0.932 | 0.145 | 26.43     | 0.927 | 0.144 | 26.39     | 0.922 | 0.162 | 26.10        | 0.920 | 0.160 | 26.43          | 0.924 | 0.164 |
| 7  | Coin             | 24.43     | 0.897 | 0.242 | 24.19     | 0.897 | 0.208 | 22.73     | 0.879 | 0.233 | 22.67        | 0.871 | 0.231 | 22.69          | 0.881 | 0.227 |
| 8  | Blue Cup         | 27.19     | 0.922 | 0.183 | 26.95     | 0.919 | 0.199 | 26.48     | 0.913 | 0.210 | 26.39        | 0.911 | 0.206 | 26.19          | 0.910 | 0.227 |
| 9  | Burnout Wheel    | 24.71     | 0.885 | 0.199 | 23.35     | 0.865 | 0.199 | 23.38     | 0.867 | 0.197 | 23.39        | 0.860 | 0.204 | 23.78          | 0.876 | 0.189 |
| 10 | Cheetah          | 28.88     | 0.889 | 0.375 | 29.17     | 0.887 | 0.392 | 28.40     | 0.881 | 0.389 | 28.41        | 0.880 | 0.405 | 27.98          | 0.866 | 0.430 |
| 11 | Hard Disk        | 28.12     | 0.959 | 0.230 | 27.59     | 0.955 | 0.254 | 27.75     | 0.956 | 0.252 | 27.72        | 0.954 | 0.250 | 27.89          | 0.958 | 0.251 |
| 12 | Wet Dog          | 29.67     | 0.947 | 0.121 | 29.35     | 0.945 | 0.130 | 29.09     | 0.943 | 0.145 | 28.93        | 0.939 | 0.146 | 29.17          | 0.942 | 0.145 |
| 13 | Hair2            | 39.44     | 0.987 | 0.126 | 39.73     | 0.988 | 0.167 | 39.75     | 0.987 | 0.166 | 39.73        | 0.987 | 0.157 | 39.48          | 0.987 | 0.159 |
|    | Avg. Challenging | 28.05     | 0.922 | 0.184 | 27.58     | 0.918 | 0.188 | 27.10     | 0.909 | 0.208 | 27.03        | 0.906 | 0.205 | 26.99          | 0.907 | 0.212 |
| 14 | Biker            | 27.62     | 0.906 | 0.291 | 29.05     | 0.929 | 0.208 | 26.81     | 0.900 | 0.308 | 26.83        | 0.900 | 0.310 | 25.44          | 0.883 | 0.354 |
| 15 | Drifting Car     | 29.44     | 0.942 | 0.216 | 29.67     | 0.950 | 0.142 | 28.25     | 0.935 | 0.217 | 28.15        | 0.933 | 0.220 | 26.83          | 0.918 | 0.265 |
| 16 | Billiard         | 35.79     | 0.978 | 0.062 | 36.21     | 0.982 | 0.064 | 34.51     | 0.976 | 0.081 | 34.50        | 0.976 | 0.084 | 32.81          | 0.971 | 0.103 |
| 17 | Bicycle          | 26.84     | 0.917 | 0.204 | 26.69     | 0.921 | 0.186 | 25.64     | 0.910 | 0.221 | 25.41        | 0.907 | 0.224 | 24.75          | 0.905 | 0.233 |
| 18 | Ducks            | 27.24     | 0.828 | 0.324 | 27.66     | 0.842 | 0.306 | 27.02     | 0.823 | 0.356 | 27.16        | 0.826 | 0.366 | 26.76          | 0.819 | 0.386 |
| 19 | Football Skills  | 31.31     | 0.967 | 0.058 | 31.68     | 0.972 | 0.047 | 30.19     | 0.963 | 0.065 | 29.82        | 0.960 | 0.071 | 29.34          | 0.958 | 0.075 |
| 20 | Hula Hoop        | 28.88     | 0.915 | 0.201 | 29.83     | 0.952 | 0.092 | 27.74     | 0.909 | 0.204 | 27.69        | 0.907 | 0.203 | 26.39          | 0.864 | 0.280 |
| 21 | Running Women    | 26.49     | 0.907 | 0.229 | 26.87     | 0.927 | 0.189 | 25.42     | 0.900 | 0.248 | 25.63        | 0.900 | 0.252 | 24.81          | 0.890 | 0.271 |
| 22 | Running Men      | 25.91     | 0.921 | 0.194 | 26.11     | 0.931 | 0.164 | 24.81     | 0.908 | 0.220 | 24.96        | 0.908 | 0.224 | 24.39          | 0.900 | 0.243 |
| 23 | Butterfly        | 27.85     | 0.939 | 0.141 | 27.70     | 0.951 | 0.080 | 26.38     | 0.929 | 0.156 | 26.44        | 0.927 | 0.156 | 25.63          | 0.904 | 0.196 |
| 24 | Dog2             | 22.27     | 0.641 | 0.474 | 22.78     | 0.676 | 0.382 | 22.13     | 0.632 | 0.509 | 22.08        | 0.624 | 0.495 | 21.82          | 0.619 | 0.513 |
| 25 | Backflip         | 32.55     | 0.970 | 0.064 | 32.82     | 0.981 | 0.047 | 31.07     | 0.973 | 0.070 | 30.70        | 0.970 | 0.077 | 29.76          | 0.965 | 0.090 |
|    | Avg. Full Set    | 28.27     | 0.910 | 0.190 | 28.22     | 0.910 | 0.170 | 27.29     | 0.900 | 0.210 | 27.23        | 0.900 | 0.210 | 26.79          | 0.890 | 0.230 |

**Table 2: Comparing temporal upsampling $\times 8$  results on our TSR video dataset.** When applied to LTR videos with severe motion blur and motion aliasing, frame interpolation methods (e.g., Nvidia SlowMo [2] and DAIN [1]) score significantly lower. However, even methods trained to overcome such challenges, but were trained on external datasets (Flawless [3]), struggle on videos that do not represent the typical motions and dynamic behaviors they were trained on. Videos 1-13 are such challenging examples.



| #  |                  | Only Within |       |       | Only Across |       |       | Best Config |       |       |
|----|------------------|-------------|-------|-------|-------------|-------|-------|-------------|-------|-------|
|    |                  | PSNR [dB]   | SSIM  | LPIPS | PSNR [dB]   | SSIM  | LPIPS | PSNR [dB]   | SSIM  | LPIPS |
| 1  | Water            | 34.39       | 0.980 | 0.012 | 35.52       | 0.987 | 0.008 | 35.52       | 0.987 | 0.008 |
| 2  | Jelly            | 29.32       | 0.953 | 0.016 | 29.92       | 0.955 | 0.017 | 29.92       | 0.955 | 0.015 |
| 3  | Diamonds         | 27.81       | 0.930 | 0.036 | 28.06       | 0.932 | 0.037 | 28.38       | 0.933 | 0.036 |
| 4  | Fire             | 32.44       | 0.976 | 0.037 | 32.50       | 0.976 | 0.036 | 32.50       | 0.976 | 0.036 |
| 5  | Hair3            | 28.67       | 0.927 | 0.052 | 28.87       | 0.929 | 0.050 | 28.87       | 0.929 | 0.050 |
| 6  | Soap             | 31.35       | 0.953 | 0.049 | 31.51       | 0.954 | 0.049 | 31.51       | 0.954 | 0.049 |
| 7  | Coin             | 26.64       | 0.900 | 0.103 | 28.13       | 0.923 | 0.083 | 28.13       | 0.923 | 0.083 |
| 8  | Blue Cup         | 32.60       | 0.966 | 0.032 | 32.85       | 0.968 | 0.031 | 32.85       | 0.968 | 0.031 |
| 9  | Burnout Wheel    | 31.31       | 0.948 | 0.031 | 31.54       | 0.950 | 0.031 | 31.54       | 0.950 | 0.031 |
| 10 | Cheetah          | 35.68       | 0.971 | 0.036 | 35.72       | 0.970 | 0.038 | 35.72       | 0.971 | 0.036 |
| 11 | Hard Disk        | 32.56       | 0.960 | 0.057 | 32.62       | 0.960 | 0.056 | 32.62       | 0.960 | 0.055 |
| 12 | Wet Dog          | 34.20       | 0.972 | 0.024 | 34.12       | 0.972 | 0.024 | 34.26       | 0.972 | 0.024 |
| 13 | Hair2            | 43.92       | 0.992 | 0.022 | 43.96       | 0.992 | 0.022 | 43.96       | 0.992 | 0.021 |
|    | Avg. Challenging | 32.38       | 0.956 | 0.039 | 32.72       | 0.959 | 0.037 | 32.75       | 0.959 | 0.037 |
| 14 | Biker            | 34.24       | 0.970 | 0.038 | 36.37       | 0.982 | 0.019 | 36.64       | 0.984 | 0.018 |
| 15 | Drifting Car     | 34.92       | 0.979 | 0.030 | 35.15       | 0.980 | 0.028 | 35.24       | 0.980 | 0.028 |
| 16 | Billiard         | 44.13       | 0.997 | 0.002 | 44.53       | 0.997 | 0.002 | 44.53       | 0.997 | 0.002 |
| 17 | Bicycle          | 31.12       | 0.952 | 0.053 | 31.20       | 0.953 | 0.052 | 31.20       | 0.953 | 0.052 |
| 18 | Ducks            | 35.74       | 0.956 | 0.068 | 35.83       | 0.957 | 0.068 | 35.84       | 0.957 | 0.064 |
| 19 | Football Skills  | 38.87       | 0.994 | 0.006 | 38.58       | 0.993 | 0.006 | 38.87       | 0.994 | 0.006 |
| 20 | Hula Hoop        | 39.92       | 0.994 | 0.004 | 39.44       | 0.993 | 0.005 | 39.92       | 0.994 | 0.004 |
| 21 | Running Women    | 33.92       | 0.978 | 0.011 | 34.20       | 0.979 | 0.010 | 34.24       | 0.980 | 0.010 |
| 22 | Running Men      | 31.13       | 0.962 | 0.034 | 31.31       | 0.963 | 0.032 | 31.31       | 0.963 | 0.032 |
| 23 | Butterfly        | 32.39       | 0.983 | 0.017 | 32.06       | 0.980 | 0.018 | 32.39       | 0.983 | 0.017 |
| 24 | Dog2             | 28.93       | 0.864 | 0.108 | 28.98       | 0.866 | 0.106 | 29.02       | 0.866 | 0.106 |
| 25 | Backflip         | 42.82       | 0.998 | 0.002 | 43.14       | 0.998 | 0.002 | 43.33       | 0.998 | 0.002 |
|    | Avg. Full Set    | 33.96       | 0.962 | 0.035 | 34.25       | 0.964 | 0.033 | 34.33       | 0.965 | 0.033 |

Table 3: Ablation study: ‘Within’ vs. ‘Across’ examples: Results of our atomic TSRx2 network, when trained on examples extracted from: (i) the same-dimension only (‘Within’); (ii) across-dimensions only (‘Across’); (iii) best configuration for each video – ‘within’, ‘across’, or both. Videos 1-13 are the Challenging dataset. The ablation results indicate that on average, the cross-dimension augmentations are more informative than the within (same-dimension) augmentations, leading to an overall improvement in PSNR, SSIM and LPIPS. However, since different videos have different preferences, training each video with its best ‘within’ and/or ‘across’ configuration can provide a small additional overall improvement.

## References

1. Bao, W., Lai, W.S., Ma, C., Zhang, X., Gao, Z., Yang, M.H.: Depth-aware video frame interpolation. In: Proceedings of the IEEE Conference on Computer Vision and Pattern Recognition (CVPR). pp. 3703–3712 (2019) 1, 4
2. Jiang, H., Sun, D., Jampani, V., Yang, M.H., Learned-Miller, E., Kautz, J.: Super slomo: High quality estimation of multiple intermediate frames for video interpolation. In: Proceedings of the IEEE Conference on Computer Vision and Pattern Recognition (CVPR) (2018) 1, 4
3. Jin, M., Hu, Z., Favaro, P.: Learning to extract flawless slow motion from blurry videos. In: The IEEE Conference on Computer Vision and Pattern Recognition (CVPR) (2019) 1, 3, 4
4. Kiani Galoogahi, H., Fagg, A., Huang, C., Ramanan, D., Lucey, S.: Need for speed: A benchmark for higher frame rate object tracking. In: Proceedings of the IEEE International Conference on Computer Vision (CVPR) (2017) 1
5. Zhang, R., Isola, P., Efros, A.A., Shechtman, E., Wang, O.: The unreasonable effectiveness of deep features as a perceptual metric. In: The IEEE Conference on Computer Vision and Pattern Recognition (CVPR) (2018) 1
